# Supplementary material for: Rate coefficients for the reactions of OH radicals with C 3 –C 11 alkanes determined by the relative-rate technique
Source: Copernicus journal article supplement (doi:10.5194/acp-24-11409-2024), 2024-10-11
Supplement: Supplementary file 1 [file acp-24-11409-2024-supplement.pdf]

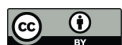

*Supplement of*

## **Rate coefficients for the reactions of OH radicals with C<sub>3</sub>–C<sub>11</sub> alkanes determined by the relative-rate technique**

**Yanyan Xin et al.**

*Correspondence to:* Chengtang Liu (ctliu@rcees.ac.cn)

The copyright of individual parts of the supplement might differ from the article licence.

**This file contains, Supplementary Tables: 1-2 and Supplementary Figures:1-15**

**Table S1.** Initial conditions of the various species injected into the reactor.

| Alkanes | H <sub>2</sub> O <sub>2</sub> | N <sub>2</sub> /Air | PAMs  |
|---------|-------------------------------|---------------------|-------|
| 10 ppb  | 100 ul                        | 250 L               | 2.5 L |

**Table S2.** Rate coefficients for OH + Alkanes in the N<sub>2</sub> and O<sub>2</sub> at 298±1 K.

| Alkanes    | Bath gas       | Reference   | This work                                             |                                                                                                                 |                                                                                                                           |
|------------|----------------|-------------|-------------------------------------------------------|-----------------------------------------------------------------------------------------------------------------|---------------------------------------------------------------------------------------------------------------------------|
|            |                |             | $k_{\text{OH}}/k_{\text{reference}}$<br>$\pm 1\sigma$ | $k_{\text{OH}}$<br>$\pm 1\sigma$<br>( $\times 10^{-12} \text{ cm}^3$<br>$\text{molecule}^{-1} \text{ s}^{-1}$ ) | $k_{\text{OH-av}}^{\text{a}}$<br>$\pm 1\sigma$<br>( $\times 10^{-12} \text{ cm}^3 \text{ molecule}^{-1} \text{ s}^{-1}$ ) |
| Propane    | N <sub>2</sub> | n-Hexane    | 0.278±0.001                                           | (1.38±0.01)                                                                                                     |                                                                                                                           |
|            |                | Cyclohexane | 0.187±0.004                                           | (1.25±0.03)                                                                                                     | (1.38±0.05)                                                                                                               |
|            |                | n-Octane    | 0.174±0.020                                           | (1.34±0.04)                                                                                                     |                                                                                                                           |
|            | O <sub>2</sub> | n-Hexane    | 0.178±0.002                                           | (0.886±0.012)                                                                                                   |                                                                                                                           |
|            |                | Cyclohexane | 0.133±0.004                                           | (0.893±0.026)                                                                                                   | (0.888±0.084)                                                                                                             |
|            |                | n-Octane    | 0.109±0.008                                           | (0.925±0.065)                                                                                                   |                                                                                                                           |
| Isobutane  | N <sub>2</sub> | n-Hexane    | 0.427±0.048                                           | (2.12±0.24)                                                                                                     |                                                                                                                           |
|            |                | Cyclohexane | 0.302±0.052                                           | (2.02±0.35)                                                                                                     | (2.10±0.32)                                                                                                               |
|            |                | n-Octane    | 0.254±0.041                                           | (2.15±0.35)                                                                                                     |                                                                                                                           |
|            | O <sub>2</sub> | n-Hexane    | 0.422±0.004                                           | (2.10±0.02)                                                                                                     |                                                                                                                           |
|            |                | Cyclohexane | 0.312±0.002                                           | (2.24±0.02)                                                                                                     | (2.09±0.09)                                                                                                               |
|            |                | n-Octane    | 0.262±0.006                                           | (2.22±0.05)                                                                                                     |                                                                                                                           |
| n-Butane   | N <sub>2</sub> | n-Hexane    | 0.511±0.071                                           | (2.54±0.35)                                                                                                     |                                                                                                                           |
|            |                | Cyclohexane | 0.423±0.120                                           | (2.83±0.80)                                                                                                     | (2.64±0.43)                                                                                                               |
|            |                | n-Octane    | 0.343±0.084                                           | (2.91±0.71)                                                                                                     |                                                                                                                           |
|            | O <sub>2</sub> | n-Hexane    | 0.517±0.032                                           | (2.57±0.16)                                                                                                     |                                                                                                                           |
|            |                | Cyclohexane | 0.396±0.039                                           | (2.65±0.26)                                                                                                     | (2.62±0.28)                                                                                                               |
|            |                | n-Octane    | 0.333±0.044                                           | (2.82±0.37)                                                                                                     |                                                                                                                           |
| Isopentane | N <sub>2</sub> | n-Hexane    | 0.715±0.038                                           | (3.55±0.19)                                                                                                     |                                                                                                                           |
|            |                | Cyclohexane | 0.434±0.061                                           | (2.91±0.41)                                                                                                     | (3.40±0.32)                                                                                                               |
|            |                | n-Octane    | 0.363±0.054                                           | (3.08±0.46)                                                                                                     |                                                                                                                           |
|            | O <sub>2</sub> | n-Hexane    | 0.446±0.020                                           | (2.21±0.10)                                                                                                     |                                                                                                                           |
|            |                | Cyclohexane | 0.330±0.012                                           | (2.21±0.08)                                                                                                     | (2.33±0.07)                                                                                                               |
|            |                | n-Octane    | 0.275±0.001                                           | (2.33±0.01)                                                                                                     |                                                                                                                           |

|                    |                |             |             |             |             |
|--------------------|----------------|-------------|-------------|-------------|-------------|
| n-pentane          | N <sub>2</sub> | n-Hexane    | 0.764±0.039 | (3.80±0.20) | (3.80±0.07) |
|                    |                | Cyclohexane | 0.533±0.006 | (3.57±0.04) |             |
|                    |                | n-Octane    | 0.448±0.001 | (3.80±0.01) |             |
|                    | Air            | n-Hexane    | 0.709±0.042 | (3.52±0.21) | (3.59±0.25) |
|                    |                | Cyclohexane | 0.527±0.021 | (3.53±0.14) |             |
|                    |                | n-Octane    | 0.454±0.029 | (3.85±0.24) |             |
| Cyclopentane       | O <sub>2</sub> | n-Hexane    | 0.754±0.011 | (3.75±0.06) | (3.75±0.13) |
|                    |                | Cyclohexane | 0.558±0.005 | (3.74±0.03) |             |
|                    |                | n-Octane    | 0.467±0.012 | (3.96±0.10) |             |
|                    | N <sub>2</sub> | n-Hexane    | 0.944±0.026 | (4.69±0.13) | (4.88±0.19) |
|                    |                | Cyclohexane | 0.702±0.019 | (4.70±0.13) |             |
|                    |                | n-Octane    | 0.593±0.010 | (5.03±0.08) |             |
| 2,2-Dimethylbutane | O <sub>2</sub> | n-Hexane    | 0.924±0.007 | (4.59±0.04) | (4.59±0.14) |
|                    |                | Cyclohexane | 0.673±0.010 | (4.50±0.07) |             |
|                    |                | n-Octane    | 0.576±0.014 | (4.89±0.12) |             |
|                    | N <sub>2</sub> | n-Hexane    | 0.363±0.001 | (1.80±0.01) | (1.80±0.06) |
|                    |                | Cyclohexane | 0.254±0.016 | (1.70±0.11) |             |
|                    |                | n-Octane    | 0.213±0.011 | (1.81±0.09) |             |
| 2,3-Dimethylbutane | O <sub>2</sub> | n-Hexane    | 0.327±0.015 | (1.63±0.08) | (1.63±0.18) |
|                    |                | Cyclohexane | 0.238±0.016 | (1.59±0.11) |             |
|                    |                | n-Octane    | 0.204±0.016 | (1.73±0.13) |             |
|                    | N <sub>2</sub> | n-Hexane    | 1.133±0.032 | (5.63±0.16) | (5.72±0.11) |
|                    |                | Cyclohexane | 0.815±0.005 | (5.45±0.03) |             |
|                    |                | n-Octane    | 0.686±0.002 | (5.82±0.02) |             |
| 2-Methylpentane    | O <sub>2</sub> | n-Hexane    | 1.093±0.018 | (5.43±0.09) | (5.32±0.17) |
|                    |                | Cyclohexane | 0.786±0.008 | (5.25±0.06) |             |
|                    |                | n-Octane    | 0.650±0.019 | (5.52±0.17) |             |
|                    | N <sub>2</sub> | n-Hexane    | 0.920±0.016 | (4.57±0.08) | (4.58±0.21) |
|                    |                | Cyclohexane | 0.662±0.035 | (4.43±0.23) |             |
|                    |                | n-Octane    | 0.557±0.024 | (4.72±0.20) |             |
| 3-Methylpentane    | O <sub>2</sub> | n-Hexane    | 0.899±0.001 | (4.47±0.01) | (4.46±0.06) |
|                    |                | Cyclohexane | 0.646±0.003 | (4.32±0.02) |             |
|                    |                | n-Octane    | 0.535±0.007 | (4.54±0.06) |             |
| N <sub>2</sub>     | n-Hexane       | 1.000±0.035 | (4.97±0.17) | (4.81±0.08) |             |
|                    | Cyclohexane    | 0.718±0.001 | (4.80±0.01) |             |             |
|                    | n-Octane       | 0.604±0.005 | (5.13±0.04) |             |             |

|                        |                |             |             |             |             |
|------------------------|----------------|-------------|-------------|-------------|-------------|
| methylcyclopentane     | O <sub>2</sub> | n-Hexane    | 0.973±0.039 | (4.83±0.20) | (4.79±0.26) |
|                        |                | Cyclohexane | 0.701±0.025 | (4.69±0.16) |             |
|                        |                | n-Octane    | 0.582±0.028 | (4.94±0.24) |             |
|                        | N <sub>2</sub> | n-Hexane    | 1.455±0.044 | (7.23±0.22) | (7.14±0.13) |
|                        |                | Cyclohexane | 1.046±0.004 | (7.00±0.28) |             |
|                        |                | n-Octane    | 0.881±0.005 | (7.47±0.04) |             |
|                        | O <sub>2</sub> | n-Hexane    | 1.404±0.046 | (6.98±0.23) | (6.89±0.28) |
|                        |                | Cyclohexane | 1.010±0.027 | (6.76±0.18) |             |
|                        |                | n-Octane    | 0.838±0.037 | (7.11±0.31) |             |
| 2,4-Dimethylpentane    | N <sub>2</sub> | n-Hexane    | 0.967±0.025 | (4.81±0.12) | (4.96±0.07) |
|                        |                | Cyclohexane | 0.775±0.088 | (5.18±0.59) |             |
|                        |                | n-Octane    | 0.585±0.001 | (4.96±0.01) |             |
|                        | O <sub>2</sub> | n-Hexane    | 0.944±0.032 | (4.69±0.16) | (4.87±0.24) |
|                        |                | Cyclohexane | 0.679±0.019 | (4.54±0.13) |             |
|                        |                | n-Octane    | 0.564±0.026 | (4.63±0.23) |             |
| Cyclohexane            | N <sub>2</sub> | n-Hexane    | 1.392±0.049 | (6.92±0.25) | (7.12±0.23) |
|                        |                | Cyclohexane | --          | --          |             |
|                        |                | n-Octane    | 0.842±0.008 | (7.14±0.07) |             |
|                        | O <sub>2</sub> | n-Hexane    | 1.388±0.010 | (6.90±0.05) | (6.92±0.18) |
|                        |                | Cyclohexane | --          | --          |             |
|                        |                | n-Octane    | 0.830±0.013 | (7.04±0.11) |             |
| 2-Methylhexane         | N <sub>2</sub> | n-Hexane    | 1.366±0.055 | (6.79±0.27) | (6.57±0.12) |
|                        |                | Cyclohexane | 0.979±0.003 | (6.55±0.02) |             |
|                        |                | n-Octane    | 0.825±0.010 | (7.00±0.09) |             |
|                        | O <sub>2</sub> | n-Hexane    | 1.415±0.015 | (7.03±0.08) | (7.14±0.16) |
|                        |                | Cyclohexane | 1.020±0.022 | (6.83±0.14) |             |
|                        |                | n-Octane    | 0.852±0.006 | (7.22±0.05) |             |
| 3-Methylhexane         | N <sub>2</sub> | n-Hexane    | 1.310±0.022 | (6.51±0.11) | (6.53±0.21) |
|                        |                | Cyclohexane | 0.938±0.023 | (6.27±0.15) |             |
|                        |                | n-Octane    | 0.794±0.015 | (6.73±0.13) |             |
|                        | O <sub>2</sub> | n-Hexane    | 1.401±0.017 | (6.96±0.08) | (7.11±0.10) |
|                        |                | Cyclohexane | 1.007±0.019 | (6.73±0.13) |             |
|                        |                | n-Octane    | 0.840±0.002 | (7.12±0.02) |             |
| 2,2,4-Trimethylpentane | N <sub>2</sub> | n-Hexane    | 0.635±0.013 | (3.16±0.06) | (3.16±0.19) |
|                        |                | Cyclohexane | 0.458±0.026 | (3.06±0.17) |             |
|                        |                | n-Octane    | 0.384±0.018 | (3.26±0.15) |             |

|                        |                |             |             |             |             |
|------------------------|----------------|-------------|-------------|-------------|-------------|
|                        | O <sub>2</sub> | n-Hexane    | 0.587±0.019 | (2.92±0.10) |             |
|                        |                | Cyclohexane | 0.421±0.018 | (2.82±0.12) | (2.94±0.17) |
|                        |                | n-Octane    | 0.352±0.008 | (2.98±0.07) |             |
| n-Heptane              | N <sub>2</sub> | n-Hexane    | 1.302±0.004 | (6.47±0.02) |             |
|                        |                | Cyclohexane | 0.937±0.029 | (6.27±0.20) | (6.47±0.13) |
|                        |                | n-Octane    | 0.789±0.017 | (6.47±0.13) |             |
|                        | O <sub>2</sub> | n-Hexane    | 1.271±0.004 | (6.32±0.02) |             |
|                        |                | Cyclohexane | 0.912±0.004 | (6.10±0.03) | (6.23±0.10) |
|                        |                | n-Octane    | 0.760±0.012 | (6.45±0.10) |             |
| Methylcyclohexane      | N <sub>2</sub> | n-Hexane    | 1.914±0.070 | (9.51±0.35) |             |
|                        |                | Cyclohexane | 1.374±0.001 | (9.19±0.01) | (9.20±0.08) |
|                        |                | n-Octane    | 1.156±0.013 | (9.80±0.11) |             |
|                        | O <sub>2</sub> | n-Hexane    | 1.944±0.025 | (9.66±0.12) |             |
|                        |                | Cyclohexane | 1.400±0.007 | (9.37±0.05) | (9.43±0.17) |
|                        |                | n-Octane    | 1.165±0.023 | (9.88±0.20) |             |
| 2,3,4-Trimethylpentane | N <sub>2</sub> | n-Hexane    | 1.383±0.013 | (6.88±0.06) |             |
|                        |                | Cyclohexane | 0.997±0.043 | (6.67±0.29) | (6.88±0.21) |
|                        |                | n-Octane    | 0.839±0.028 | (7.12±0.24) |             |
|                        | O <sub>2</sub> | n-Hexane    | 1.266±0.032 | (6.29±0.16) |             |
|                        |                | Cyclohexane | 0.908±0.031 | (6.08±0.21) | (6.35±0.21) |
|                        |                | n-Octane    | 0.757±0.010 | (6.42±0.09) |             |
| 2-Methylheptane        | N <sub>2</sub> | n-Hexane    | 1.521±0.009 | (7.56±0.05) |             |
|                        |                | Cyclohexane | 1.096±0.053 | (8.07±0.38) | (7.57±0.18) |
|                        |                | n-Octane    | 0.923±0.029 | (7.83±0.24) |             |
|                        | O <sub>2</sub> | n-Hexane    | 1.444±0.017 | (7.18±0.09) |             |
|                        |                | Cyclohexane | 1.037±0.021 | (6.94±0.14) | (7.33±0.04) |
|                        |                | n-Octane    | 0.865±0.001 | (7.33±0.01) |             |
| 3-Methylheptane        | N <sub>2</sub> | n-Hexane    | 1.525±0.022 | (7.58±0.11) |             |
|                        |                | Cyclohexane | 1.099±0.054 | (7.35±0.36) | (7.59±0.26) |
|                        |                | n-Octane    | 0.925±0.036 | (7.85±0.31) |             |
|                        | O <sub>2</sub> | n-Hexane    | 1.448±0.020 | (7.20±0.10) |             |
|                        |                | Cyclohexane | 1.040±0.024 | (6.96±0.16) | (7.34±0.11) |
|                        |                | n-Octane    | 0.867±0.002 | (7.35±0.02) |             |
| n-Octane               | N <sub>2</sub> | n-Hexane    | 1.651±0.043 | (8.20±0.21) |             |
|                        |                | Cyclohexane | 1.186±0.012 | (7.93±0.08) | (7.97±0.24) |
|                        |                | n-Octane    | --          | --          |             |

|                |             |             |              |              |
|----------------|-------------|-------------|--------------|--------------|
| O <sub>2</sub> | n-Hexane    | 1.666±0.013 | (8.28±0.06)  |              |
|                | Cyclohexane | 1.199±0.019 | (8.02±0.13)  | (8.23±0.21)  |
|                | n-Octane    | --          | --           |              |
| N <sub>2</sub> | n-Hexane    | 2.124±0.057 | (10.57±0.28) |              |
|                | Cyclohexane | 1.525±0.016 | (10.20±0.10) | (10.90±0.04) |
|                | n-Octane    | 1.286±0.001 | (10.90±0.01) |              |
| Nonane         | n-Hexane    | 2.117±0.002 | (10.52±0.01) |              |
|                | Cyclohexane | 1.525±0.011 | (10.20±0.08) | (10.52±0.09) |
|                | n-Octane    | 1.269±0.012 | (10.76±0.10) |              |
| n-Decane       | n-Hexane    | 2.355±0.078 | (11.71±0.39) |              |
|                | Cyclohexane | 1.691±0.047 | (11.31±0.10) | (11.54±0.16) |
|                | n-Octane    | 1.425±0.009 | (12.09±0.07) |              |
| O <sub>2</sub> | n-Hexane    | 2.506±0.028 | (12.45±0.14) |              |
|                | Cyclohexane | 1.804±0.034 | (12.07±0.22) | (12.35±0.29) |
|                | n-Octane    | 1.503±0.004 | (12.75±0.03) |              |
| N <sub>2</sub> | n-Hexane    | 2.685±0.042 | (13.34±0.21) |              |
|                | Cyclohexane | 1.880±0.093 | (12.58±0.63) | (13.30±0.34) |
|                | n-Octane    | 1.592±0.056 | (13.50±0.47) |              |
| n-Undecane     | n-Hexane    | 2.684±0.266 | (13.34±1.32) |              |
|                | Cyclohexane | 1.829±0.132 | (12.24±0.88) | (13.92±0.65) |
|                | n-Octane    | 1.523±0.069 | (12.92±0.58) |              |

a: Weighted average  $k_{av} = (w_{ref1} k_{ref1} + w_{ref2} k_{ref2} + \dots) / (w_{ref1} + w_{ref2} + \dots)$ , where  $w_{ref1} = 1/\sigma_{ref1}^2$ , etc. The error,  $\sigma_{av}$ , was given by:  $\sigma_{av} = (1/\sigma_{ref1}^2 + 1/\sigma_{ref2}^2 + \dots)^{-0.5}$ .

**Table S3.** Rate coefficients for OH + Alkanes in N<sub>2</sub> and Air at 273-323 K.

| T (K)              | $k_{OH+n-Hexane}$<br>(cm <sup>3</sup> molecule <sup>-1</sup> s <sup>-1</sup> ) | Slope <sup>a</sup> | $k_{OH}^b$<br>(cm <sup>3</sup> molecule <sup>-1</sup> s <sup>-1</sup> ) | Bath gas       |
|--------------------|--------------------------------------------------------------------------------|--------------------|-------------------------------------------------------------------------|----------------|
| 2,3-Dimethylbutane |                                                                                |                    |                                                                         |                |
| 273                | 4.17×10 <sup>-12</sup>                                                         | 1.224±0.005        | (5.10±0.05)×10 <sup>-12</sup>                                           | Air            |
|                    |                                                                                | 1.220              | 5.09×10 <sup>-12</sup>                                                  | N <sub>2</sub> |
| 283                | 4.44×10 <sup>-12</sup>                                                         | 1.201±0.008        | (5.33±0.07)×10 <sup>-12</sup>                                           | Air            |
|                    |                                                                                | 1.187              | 5.27×10 <sup>-12</sup>                                                  | N <sub>2</sub> |
| 293                | 4.70×10 <sup>-12</sup>                                                         | 1.181±0.009        | (5.55±0.09)×10 <sup>-12</sup>                                           | Air            |
|                    |                                                                                | 1.146              | 5.39×10 <sup>-12</sup>                                                  | N <sub>2</sub> |

|                    |                        |             |                                   |                |
|--------------------|------------------------|-------------|-----------------------------------|----------------|
| 303                | $4.97 \times 10^{-12}$ | 1.126±0.004 | $(5.60 \pm 0.04) \times 10^{-12}$ | Air            |
|                    |                        | 1.134       | $5.64 \times 10^{-12}$            | N <sub>2</sub> |
| 313                | $5.22 \times 10^{-12}$ | 1.091±0.001 | $(5.70 \pm 0.01) \times 10^{-12}$ | Air            |
|                    |                        | 1.088       | $5.68 \times 10^{-12}$            | N <sub>2</sub> |
| 323                | $5.48 \times 10^{-12}$ | 1.061±0.001 | $(5.82 \pm 0.01) \times 10^{-12}$ | Air            |
|                    |                        | 1.052       | $5.76 \times 10^{-12}$            | N <sub>2</sub> |
| Methylcyclopentane |                        |             |                                   |                |
| 273                | $4.17 \times 10^{-12}$ | 1.544±0.006 | $(6.44 \pm 0.03) \times 10^{-12}$ | Air            |
|                    |                        | 1.515       | $6.32 \times 10^{-12}$            | N <sub>2</sub> |
| 283                | $4.44 \times 10^{-12}$ | 1.447±0.040 | $(6.43 \pm 0.18) \times 10^{-12}$ | Air            |
|                    |                        | 1.478       | $6.56 \times 10^{-12}$            | N <sub>2</sub> |
| 293                | $4.70 \times 10^{-12}$ | 1.417±0.016 | $(6.66 \pm 0.08) \times 10^{-12}$ | Air            |
|                    |                        | 1.448       | $6.80 \times 10^{-12}$            | N <sub>2</sub> |
| 303                | $4.97 \times 10^{-12}$ | 1.398±0.014 | $(6.95 \pm 0.07) \times 10^{-12}$ | Air            |
|                    |                        | 1.430       | $7.11 \times 10^{-12}$            | N <sub>2</sub> |
| 313                | $5.22 \times 10^{-12}$ | 1.388±0.002 | $(7.24 \pm 0.01) \times 10^{-12}$ | Air            |
|                    |                        | 1.359       | $7.09 \times 10^{-12}$            | N <sub>2</sub> |
| 323                | $5.48 \times 10^{-12}$ | 1.337±0.010 | $(7.33 \pm 0.05) \times 10^{-12}$ | Air            |
|                    |                        | 1.334       | $7.31 \times 10^{-12}$            | N <sub>2</sub> |
| n-Heptane          |                        |             |                                   |                |
| 273                | $4.17 \times 10^{-12}$ | 1.287±0.040 | $(5.37 \pm 0.17) \times 10^{-12}$ | Air            |
|                    |                        | 1.288       | $5.37 \times 10^{-12}$            | N <sub>2</sub> |
| 283                | $4.44 \times 10^{-12}$ | 1.308±0.020 | $(5.81 \pm 0.09) \times 10^{-12}$ | Air            |
|                    |                        | 1.340       | $5.95 \times 10^{-12}$            | N <sub>2</sub> |
| 293                | $4.70 \times 10^{-12}$ | 1.311±0.049 | $(6.16 \pm 0.23) \times 10^{-12}$ | Air            |
|                    |                        | 1.318       | $6.19 \times 10^{-12}$            | N <sub>2</sub> |
| 303                | $4.97 \times 10^{-12}$ | 1.323±0.011 | $(6.58 \pm 0.06) \times 10^{-12}$ | Air            |
|                    |                        | 1.312       | $6.52 \times 10^{-12}$            | N <sub>2</sub> |
| 313                | $5.22 \times 10^{-12}$ | 1.359±0.005 | $(7.09 \pm 0.01) \times 10^{-12}$ | Air            |
|                    |                        | 1.275       | $6.66 \times 10^{-12}$            | N <sub>2</sub> |
| 323                | $5.48 \times 10^{-12}$ | 1.318±0.005 | $(7.22 \pm 0.03) \times 10^{-12}$ | Air            |
|                    |                        | 1.264       | $6.93 \times 10^{-12}$            | N <sub>2</sub> |
| 3-Methylheptane    |                        |             |                                   |                |
| 273                | $4.17 \times 10^{-12}$ | 1.584±0.018 | $(6.61 \pm 0.07) \times 10^{-12}$ | Air            |
|                    |                        | 1.616       | $6.74 \times 10^{-12}$            | N <sub>2</sub> |
| 283                | $4.44 \times 10^{-12}$ | 1.591±0.003 | $(7.06 \pm 0.02) \times 10^{-12}$ | Air            |
|                    |                        | 1.643       | $7.29 \times 10^{-12}$            | N <sub>2</sub> |
| 293                | $4.70 \times 10^{-12}$ | 1.612±0.076 | $(7.58 \pm 0.36) \times 10^{-12}$ | Air            |
|                    |                        | 1.630       | $7.66 \times 10^{-12}$            | N <sub>2</sub> |
| 303                | $4.97 \times 10^{-12}$ | 1.595±0.047 | $(7.93 \pm 0.24) \times 10^{-12}$ | Air            |
|                    |                        | 1.639       | $8.14 \times 10^{-12}$            | N <sub>2</sub> |

|           |                        |             |                                   |                |
|-----------|------------------------|-------------|-----------------------------------|----------------|
| 313       | $5.22 \times 10^{-12}$ | 1.598±0.072 | $(8.34 \pm 0.38) \times 10^{-12}$ | Air            |
|           |                        | 1.558       | $8.13 \times 10^{-12}$            | N <sub>2</sub> |
| 323       | $5.48 \times 10^{-12}$ | 1.550±0.001 | $(8.49 \pm 0.01) \times 10^{-12}$ | Air            |
|           |                        | 1.526       | $8.36 \times 10^{-12}$            | N <sub>2</sub> |
| n-Octane  |                        |             |                                   |                |
| 273       | $4.17 \times 10^{-12}$ | 1.637±0.075 | $(6.83 \pm 0.31) \times 10^{-12}$ | Air            |
|           |                        | 1.607       | $6.70 \times 10^{-12}$            | N <sub>2</sub> |
| 283       | $4.44 \times 10^{-12}$ | 1.642±0.007 | $(7.29 \pm 0.03) \times 10^{-12}$ | Air            |
|           |                        | 1.716       | $7.62 \times 10^{-12}$            | N <sub>2</sub> |
| 293       | $4.70 \times 10^{-12}$ | 1.617±0.020 | $7.60 \pm 0.10 \times 10^{-12}$   | Air            |
|           |                        | 1.655       | $7.78 \times 10^{-12}$            | N <sub>2</sub> |
| 303       | $4.97 \times 10^{-12}$ | 1.643±0.009 | $(8.17 \pm 0.04) \times 10^{-12}$ | Air            |
|           |                        | 1.687       | $8.38 \times 10^{-12}$            | N <sub>2</sub> |
| 313       | $5.22 \times 10^{-12}$ | 1.689±0.041 | $(8.82 \pm 0.22) \times 10^{-12}$ | Air            |
|           |                        | 1.666       | $8.70 \times 10^{-12}$            | N <sub>2</sub> |
| 323       | $5.48 \times 10^{-12}$ | 1.625±0.053 | $(5.90 \pm 0.29) \times 10^{-12}$ | Air            |
|           |                        | 1.633       | $8.95 \times 10^{-12}$            | N <sub>2</sub> |
| Propane   |                        |             |                                   |                |
| 273       | $4.17 \times 10^{-12}$ | 0.170       | $7.09 \times 10^{-13}$            | Air            |
|           |                        | 0.167       | $6.97 \times 10^{-13}$            | N <sub>2</sub> |
| 283       | $4.44 \times 10^{-12}$ | 0.181±0.041 | $8.97 \times 10^{-13}$            | Air            |
|           |                        | 0.197       | $8.75 \times 10^{-13}$            | N <sub>2</sub> |
| 293       | $4.70 \times 10^{-12}$ | 0.215±0.027 | $(1.01 \pm 0.13) \times 10^{-12}$ | Air            |
|           |                        | 0.195       | $9.14 \times 10^{-13}$            | N <sub>2</sub> |
| 303       | $4.97 \times 10^{-12}$ | 0.199±0.013 | $(9.91 \pm 0.63) \times 10^{-13}$ | Air            |
|           |                        | 0.208       | $1.04 \times 10^{-12}$            | N <sub>2</sub> |
| 313       | $5.22 \times 10^{-12}$ | 0.220±0.010 | $(1.15 \pm 0.05) \times 10^{-12}$ | Air            |
|           |                        | 0.214       | $1.12 \times 10^{-12}$            | N <sub>2</sub> |
| 323       | $5.48 \times 10^{-12}$ | 0.223±0.051 | $(1.22 \pm 0.28) \times 10^{-12}$ | Air            |
|           |                        | 0.224       | $1.23 \times 10^{-12}$            | N <sub>2</sub> |
| Isobutane |                        |             |                                   |                |
| 273       | $4.17 \times 10^{-12}$ | 0.350±0.033 | $(1.46 \pm 0.14) \times 10^{-12}$ | Air            |
|           |                        | 0.338       | $1.41 \times 10^{-12}$            | N <sub>2</sub> |
| 283       | $4.44 \times 10^{-12}$ | 0.400±0.020 | $(1.78 \pm 0.09) \times 10^{-12}$ | Air            |
|           |                        | 0.378       | $1.68 \times 10^{-12}$            | N <sub>2</sub> |
| 293       | $4.70 \times 10^{-12}$ | 0.389±0.024 | $(1.83 \pm 0.11) \times 10^{-12}$ | Air            |
|           |                        | 0.394       | $1.85 \times 10^{-12}$            | N <sub>2</sub> |
| 303       | $4.97 \times 10^{-12}$ | 0.416±0.054 | $(2.07 \pm 0.27) \times 10^{-12}$ | Air            |
|           |                        | 0.421       | $2.09 \times 10^{-12}$            | N <sub>2</sub> |
| 313       | $5.22 \times 10^{-12}$ | 0.398±0.025 | $(2.08 \pm 0.13) \times 10^{-12}$ | Air            |
|           |                        | 0.415       | $2.17 \times 10^{-12}$            | N <sub>2</sub> |
| 323       | $5.48 \times 10^{-12}$ | 0.424±0.009 | $(2.32 \pm 0.05) \times 10^{-12}$ | Air            |



|     |                        |              |                                   |                |
|-----|------------------------|--------------|-----------------------------------|----------------|
|     |                        | 0.428        | $2.34 \times 10^{-12}$            | N <sub>2</sub> |
|     |                        | n-Butane     |                                   |                |
| 273 | $4.17 \times 10^{-12}$ | 0.316±0.140  | $(1.32 \pm 0.58) \times 10^{-12}$ | Air            |
|     |                        | 0.224        | $9.34 \times 10^{-13}$            | N <sub>2</sub> |
| 283 | $4.44 \times 10^{-12}$ | 0.389±0.068  | $(1.73 \pm 0.30) \times 10^{-12}$ | Air            |
|     |                        | 0.418        | $1.86 \times 10^{-12}$            | N <sub>2</sub> |
| 293 | $4.70 \times 10^{-12}$ | 0.408±0.004  | $(1.92 \pm 0.02) \times 10^{-12}$ | Air            |
|     |                        | 0.436        | $2.05 \times 10^{-12}$            | N <sub>2</sub> |
| 303 | $4.97 \times 10^{-12}$ | 0.449±0.031  | $(2.23 \pm 0.15) \times 10^{-12}$ | Air            |
|     |                        | 0.470        | $2.34 \times 10^{-12}$            | N <sub>2</sub> |
| 313 | $5.22 \times 10^{-12}$ | 0.455±0.027  | $(2.37 \pm 0.15) \times 10^{-12}$ | Air            |
|     |                        | 0.481        | $2.51 \times 10^{-12}$            | N <sub>2</sub> |
| 323 | $5.48 \times 10^{-12}$ | 0.468±0.024  | $(2.57 \pm 0.13) \times 10^{-12}$ | Air            |
|     |                        | 0.489        | $2.68 \times 10^{-12}$            | N <sub>2</sub> |
|     |                        | Isopentane   |                                   |                |
| 273 | $4.17 \times 10^{-12}$ | 0.713±0.040  | $(2.97 \pm 0.33) \times 10^{-12}$ | Air            |
|     |                        | 0.686        | $2.86 \times 10^{-12}$            | N <sub>2</sub> |
| 283 | $4.44 \times 10^{-12}$ | 0.700±0.021  | $(3.11 \pm 0.18) \times 10^{-12}$ | Air            |
|     |                        | 0.679        | $3.01 \times 10^{-12}$            | N <sub>2</sub> |
| 293 | $4.70 \times 10^{-12}$ | 0.689±0.018  | $(3.24 \pm 0.17) \times 10^{-12}$ | Air            |
|     |                        | 0.707        | $3.32 \times 10^{-12}$            | N <sub>2</sub> |
| 303 | $4.97 \times 10^{-12}$ | 0.664±0.024  | $(3.30 \pm 0.24) \times 10^{-12}$ | Air            |
|     |                        | 0.656        | $3.26 \times 10^{-12}$            | N <sub>2</sub> |
| 313 | $5.22 \times 10^{-12}$ | 0.681±0.020  | $(3.56 \pm 0.21) \times 10^{-12}$ | Air            |
|     |                        | 0.664        | $3.47 \times 10^{-12}$            | N <sub>2</sub> |
| 323 | $5.48 \times 10^{-12}$ | 0.661±0.019  | $(3.63 \pm 0.22) \times 10^{-12}$ | Air            |
|     |                        | 0.654        | $3.58 \times 10^{-12}$            | N <sub>2</sub> |
|     |                        | n-pentane    |                                   |                |
| 273 | $4.17 \times 10^{-12}$ | 0.687±0.020  | $(2.86 \pm 0.08) \times 10^{-12}$ | Air            |
|     |                        | 0.651        | $2.71 \times 10^{-12}$            | N <sub>2</sub> |
| 283 | $4.44 \times 10^{-12}$ | 0.681±0.001  | $(3.02 \pm 0.03) \times 10^{-12}$ | Air            |
|     |                        | 0.658        | $2.92 \times 10^{-12}$            | N <sub>2</sub> |
| 293 | $4.70 \times 10^{-12}$ | 0.664±0.051  | $(3.12 \pm 0.24) \times 10^{-12}$ | Air            |
|     |                        | 0.670        | $3.15 \times 10^{-12}$            | N <sub>2</sub> |
| 303 | $4.97 \times 10^{-12}$ | 0.655±0.078  | $(3.25 \pm 0.39) \times 10^{-12}$ | Air            |
|     |                        | 0.675        | $3.36 \times 10^{-12}$            | N <sub>2</sub> |
| 313 | $5.22 \times 10^{-12}$ | 0.641±0.058  | $(3.35 \pm 0.30) \times 10^{-12}$ | Air            |
|     |                        | 0.668        | $3.49 \times 10^{-12}$            | N <sub>2</sub> |
| 323 | $5.48 \times 10^{-12}$ | 0.623±0.017  | $(3.41 \pm 0.09) \times 10^{-12}$ | Air            |
|     |                        | 0.653        | $3.58 \times 10^{-12}$            | N <sub>2</sub> |
|     |                        | Cyclopentane |                                   |                |
| 273 | $4.17 \times 10^{-12}$ | 0.898±0.049  | $(3.75 \pm 0.20) \times 10^{-12}$ | Air            |
|     |                        | 0.878        | $3.66 \times 10^{-12}$            | N <sub>2</sub> |

|                    |                        |                        |                                                             |                       |
|--------------------|------------------------|------------------------|-------------------------------------------------------------|-----------------------|
| 283                | $4.44 \times 10^{-12}$ | 0.918±0.006<br>0.933   | $(4.08 \pm 0.03) \times 10^{-12}$<br>$4.14 \times 10^{-12}$ | Air<br>N <sub>2</sub> |
| 293                | $4.70 \times 10^{-12}$ | 0.972±0.021<br>0.948   | $(4.57 \pm 0.10) \times 10^{-12}$<br>$4.45 \times 10^{-12}$ | Air<br>N <sub>2</sub> |
| 303                | $4.97 \times 10^{-12}$ | 0.949±0.001<br>0.950   | $(4.72 \pm 0.01) \times 10^{-12}$<br>$4.72 \times 10^{-12}$ | Air<br>N <sub>2</sub> |
| 313                | $5.22 \times 10^{-12}$ | 0.993±0.007<br>0.943   | $(5.18 \pm 0.04) \times 10^{-12}$<br>$4.92 \times 10^{-12}$ | Air<br>N <sub>2</sub> |
| 323                | $5.48 \times 10^{-12}$ | 0.959±0.003<br>0.961   | $(5.26 \pm 0.02) \times 10^{-12}$<br>$5.27 \times 10^{-12}$ | Air<br>N <sub>2</sub> |
| 2,2-Dimethylbutane |                        |                        |                                                             |                       |
| 273                | $4.17 \times 10^{-12}$ | 0.299±0.010<br>0.299   | $(1.25 \pm 0.01) \times 10^{-12}$<br>$1.25 \times 10^{-12}$ | Air<br>N <sub>2</sub> |
| 283                | $4.44 \times 10^{-12}$ | 0.329±0.023<br>0.337   | $(1.46 \pm 0.10) \times 10^{-12}$<br>$1.49 \times 10^{-12}$ | Air<br>N <sub>2</sub> |
| 293                | $4.70 \times 10^{-12}$ | 0.371±0.004<br>0.346   | $(1.74 \pm 0.02) \times 10^{-12}$<br>$1.63 \times 10^{-12}$ | Air<br>N <sub>2</sub> |
| 303                | $4.97 \times 10^{-12}$ | 0.372±0.028<br>0.387   | $(1.85 \pm 0.14) \times 10^{-12}$<br>$1.92 \times 10^{-12}$ | Air<br>N <sub>2</sub> |
| 313                | $5.22 \times 10^{-12}$ | 0.389±0.009<br>0.394   | $(2.03 \pm 0.05) \times 10^{-12}$<br>$2.06 \times 10^{-12}$ | Air<br>N <sub>2</sub> |
| 323                | $5.48 \times 10^{-12}$ | 0.376±0.009<br>0.38826 | $(2.06 \pm 0.05) \times 10^{-12}$<br>$2.17 \times 10^{-12}$ | Air<br>N <sub>2</sub> |
| 2-Methylpentane    |                        |                        |                                                             |                       |
| 273                | $4.17 \times 10^{-12}$ | 0.938±0.002<br>0.924   | $(3.91 \pm 0.01) \times 10^{-12}$<br>$3.85 \times 10^{-12}$ | Air<br>N <sub>2</sub> |
| 283                | $4.44 \times 10^{-12}$ | 0.962±0.031<br>0.951   | $(4.17 \pm 0.14) \times 10^{-12}$<br>$4.22 \times 10^{-12}$ | Air<br>N <sub>2</sub> |
| 293                | $4.70 \times 10^{-12}$ | 0.982±0.002<br>0.961   | $(4.62 \pm 0.01) \times 10^{-12}$<br>$4.52 \times 10^{-12}$ | Air<br>N <sub>2</sub> |
| 303                | $4.97 \times 10^{-12}$ | 0.954±0.002<br>0.964   | $(4.74 \pm 0.01) \times 10^{-12}$<br>$4.79 \times 10^{-12}$ | Air<br>N <sub>2</sub> |
| 313                | $5.22 \times 10^{-12}$ | 0.957±0.028<br>0.929   | $(5.00 \pm 0.15) \times 10^{-12}$<br>$4.85 \times 10^{-12}$ | Air<br>N <sub>2</sub> |
| 323                | $5.48 \times 10^{-12}$ | 0.943±0.001<br>0.932   | $(5.17 \pm 0.01) \times 10^{-12}$<br>$5.11 \times 10^{-12}$ | Air<br>N <sub>2</sub> |
| 3-Methylpentane    |                        |                        |                                                             |                       |
| 273                | $4.17 \times 10^{-12}$ | 0.882±0.016<br>0.908   | $(3.68 \pm 0.07) \times 10^{-12}$<br>$3.79 \times 10^{-12}$ | Air<br>N <sub>2</sub> |
| 283                | $4.44 \times 10^{-12}$ | 0.908±0.017<br>0.967   | $(4.03 \pm 0.08) \times 10^{-12}$<br>$4.30 \times 10^{-12}$ | Air<br>N <sub>2</sub> |
| 293                | $4.70 \times 10^{-12}$ | 0.921±0.056<br>0.951   | $(4.33 \pm 0.26) \times 10^{-12}$<br>$4.47 \times 10^{-12}$ | Air<br>N <sub>2</sub> |

|                     |                        |                      |                                                             |                       |
|---------------------|------------------------|----------------------|-------------------------------------------------------------|-----------------------|
| 303                 | $4.97 \times 10^{-12}$ | 0.928±0.035<br>0.983 | $(4.61 \pm 0.17) \times 10^{-12}$<br>$4.88 \times 10^{-12}$ | Air<br>N <sub>2</sub> |
| 313                 | $5.22 \times 10^{-12}$ | 0.886±0.073<br>0.940 | $(4.63 \pm 0.38) \times 10^{-12}$<br>$4.91 \times 10^{-12}$ | Air<br>N <sub>2</sub> |
| 323                 | $5.48 \times 10^{-12}$ | 0.914±0.010<br>0.927 | $(5.01 \pm 0.06) \times 10^{-12}$<br>$5.08 \times 10^{-12}$ | Air<br>N <sub>2</sub> |
| 2,4-Dimethylpentane |                        |                      |                                                             |                       |
| 273                 | $4.17 \times 10^{-12}$ | 0.921±0.008<br>0.922 | $(3.84 \pm 0.04) \times 10^{-12}$<br>$3.84 \times 10^{-12}$ | Air<br>N <sub>2</sub> |
| 283                 | $4.44 \times 10^{-12}$ | 0.928±0.032<br>0.943 | $(4.12 \pm 0.14) \times 10^{-12}$<br>$4.19 \times 10^{-12}$ | Air<br>N <sub>2</sub> |
| 293                 | $4.70 \times 10^{-12}$ | 0.932±0.028<br>0.946 | $(4.38 \pm 0.13) \times 10^{-12}$<br>$4.45 \times 10^{-12}$ | Air<br>N <sub>2</sub> |
| 303                 | $4.97 \times 10^{-12}$ | 0.924±0.011<br>0.929 | $(4.59 \pm 0.06) \times 10^{-12}$<br>$4.62 \times 10^{-12}$ | Air<br>N <sub>2</sub> |
| 313                 | $5.22 \times 10^{-12}$ | 0.927±0.024<br>0.898 | $(4.84 \pm 0.12) \times 10^{-12}$<br>$4.69 \times 10^{-12}$ | Air<br>N <sub>2</sub> |
| 323                 | $5.48 \times 10^{-12}$ | 0.901±0.011<br>0.878 | $(4.94 \pm 0.06) \times 10^{-12}$<br>$4.81 \times 10^{-12}$ | Air<br>N <sub>2</sub> |
| Cyclohexane         |                        |                      |                                                             |                       |
| 273                 | $4.17 \times 10^{-12}$ | 1.252±0.044<br>1.260 | $(5.22 \pm 0.18) \times 10^{-12}$<br>$5.25 \times 10^{-12}$ | Air<br>N <sub>2</sub> |
| 283                 | $4.44 \times 10^{-12}$ | 1.310±0.033<br>1.379 | $(5.82 \pm 0.15) \times 10^{-12}$<br>$6.12 \times 10^{-12}$ | Air<br>N <sub>2</sub> |
| 293                 | $4.70 \times 10^{-12}$ | 1.307±0.036<br>1.354 | $(6.14 \pm 0.17) \times 10^{-12}$<br>$6.36 \times 10^{-12}$ | Air<br>N <sub>2</sub> |
| 303                 | $4.97 \times 10^{-12}$ | 1.310±0.050<br>1.261 | $(6.51 \pm 0.25) \times 10^{-12}$<br>$6.21 \times 10^{-12}$ | Air<br>N <sub>2</sub> |
| 313                 | $5.22 \times 10^{-12}$ | 1.332±0.047<br>1.243 | $(6.96 \pm 0.25) \times 10^{-12}$<br>$6.49 \times 10^{-12}$ | Air<br>N <sub>2</sub> |
| 323                 | $5.48 \times 10^{-12}$ | 1.276±0.008<br>1.118 | $(6.99 \pm 0.05) \times 10^{-12}$<br>$6.13 \times 10^{-12}$ | Air<br>N <sub>2</sub> |
| 2-Methylhexane      |                        |                      |                                                             |                       |
| 273                 | $4.17 \times 10^{-12}$ | 1.365±0.001<br>1.372 | $(5.69 \pm 0.01) \times 10^{-12}$<br>$5.72 \times 10^{-12}$ | Air<br>N <sub>2</sub> |
| 283                 | $4.44 \times 10^{-12}$ | 1.347±0.046<br>1.327 | $(5.98 \pm 0.20) \times 10^{-12}$<br>$5.89 \times 10^{-12}$ | Air<br>N <sub>2</sub> |
| 293                 | $4.70 \times 10^{-12}$ | 1.303±0.035<br>1.280 | $(6.12 \pm 0.16) \times 10^{-12}$<br>$6.02 \times 10^{-12}$ | Air<br>N <sub>2</sub> |
| 303                 | $4.97 \times 10^{-12}$ | 1.263±0.012<br>1.250 | $(6.28 \pm 0.06) \times 10^{-12}$<br>$6.21 \times 10^{-12}$ | Air<br>N <sub>2</sub> |
| 313                 | $5.22 \times 10^{-12}$ | 1.222±0.030<br>1.212 | $(6.38 \pm 0.16) \times 10^{-12}$<br>$6.33 \times 10^{-12}$ | Air<br>N <sub>2</sub> |

|                        |                        |                      |                                                              |                       |
|------------------------|------------------------|----------------------|--------------------------------------------------------------|-----------------------|
| 323                    | $5.48 \times 10^{-12}$ | 1.184±0.029<br>1.170 | (6.49±0.16)×10 <sup>-12</sup><br>6.41×10 <sup>-12</sup>      | Air<br>N <sub>2</sub> |
| 3-Methylhexane         |                        |                      |                                                              |                       |
| 273                    | $4.17 \times 10^{-12}$ | 0.746±0.028<br>0.875 | (3.11±0.12)×10 <sup>-12</sup><br>3.65×10 <sup>-12</sup>      | Air<br>N <sub>2</sub> |
| 283                    | $4.44 \times 10^{-12}$ | 0.811±0.172<br>0.868 | (3.60±0.76)×10 <sup>-12</sup><br>3.85×10 <sup>-12</sup>      | Air<br>N <sub>2</sub> |
| 293                    | $4.70 \times 10^{-12}$ | 0.702±0.014<br>0.722 | (3.30±0.07)×10 <sup>-12</sup><br>3.39×10 <sup>-12</sup>      | Air<br>N <sub>2</sub> |
| 303                    | $4.97 \times 10^{-12}$ | 0.701±0.153<br>0.715 | (3.48±0.76)×10 <sup>-12</sup><br>3.143.55 ×10 <sup>-12</sup> | Air<br>N <sub>2</sub> |
| 313                    | $5.22 \times 10^{-12}$ | 0.787±0.160<br>0.726 | (4.11±0.08)×10 <sup>-12</sup><br>4.79×10 <sup>-12</sup>      | Air<br>N <sub>2</sub> |
| 323                    | $5.48 \times 10^{-12}$ | 0.824±0.107<br>0.738 | (4.52±0.06)×10 <sup>-12</sup><br>4.05×10 <sup>-12</sup>      | Air<br>N <sub>2</sub> |
| 2,2,4-Trimethylpentane |                        |                      |                                                              |                       |
| 273                    | $4.17 \times 10^{-12}$ | 0.611±0.001<br>0.629 | (2.55±0.01)×10 <sup>-12</sup><br>2.62×10 <sup>-12</sup>      | Air<br>N <sub>2</sub> |
| 283                    | $4.44 \times 10^{-12}$ | 0.634±0.022<br>0.633 | (2.81±0.10)×10 <sup>-12</sup><br>2.81×10 <sup>-12</sup>      | Air<br>N <sub>2</sub> |
| 293                    | $4.70 \times 10^{-12}$ | 0.625±0.006<br>0.632 | (2.94±0.03)×10 <sup>-12</sup><br>2.97×10 <sup>-12</sup>      | Air<br>N <sub>2</sub> |
| 303                    | $4.97 \times 10^{-12}$ | 0.638±0.024<br>0.632 | (3.17±0.12)×10 <sup>-12</sup><br>3.14×10 <sup>-12</sup>      | Air<br>N <sub>2</sub> |
| 313                    | $5.22 \times 10^{-12}$ | 0.633±0.030<br>0.614 | (3.30±0.16)×10 <sup>-12</sup><br>3.20×10 <sup>-12</sup>      | Air<br>N <sub>2</sub> |
| 323                    | $5.48 \times 10^{-12}$ | 0.616±0.008<br>0.608 | (3.38±0.04)×10 <sup>-12</sup><br>3.33×10 <sup>-12</sup>      | Air<br>N <sub>2</sub> |
| Methylcyclohexane      |                        |                      |                                                              |                       |
| 273                    | $4.17 \times 10^{-12}$ | 1.806±0.005<br>1.860 | (7.53±0.26)×10 <sup>-12</sup><br>7.76×10 <sup>-12</sup>      | Air<br>N <sub>2</sub> |
| 283                    | $4.44 \times 10^{-12}$ | 1.873±0.018<br>1.883 | (8.31±0.08)×10 <sup>-12</sup><br>8.36×10 <sup>-12</sup>      | Air<br>N <sub>2</sub> |
| 293                    | $4.70 \times 10^{-12}$ | 1.869±0.017<br>1.835 | (8.77±0.06)×10 <sup>-12</sup><br>8.62×10 <sup>-12</sup>      | Air<br>N <sub>2</sub> |
| 303                    | $4.97 \times 10^{-12}$ | 1.848±0.001<br>1.833 | (9.18±0.01)×10 <sup>-12</sup><br>9.11×10 <sup>-12</sup>      | Air<br>N <sub>2</sub> |
| 313                    | $5.22 \times 10^{-12}$ | 1.859±0.019<br>1.793 | (9.70±0.10)×10 <sup>-12</sup><br>9.36×10 <sup>-12</sup>      | Air<br>N <sub>2</sub> |
| 323                    | $5.48 \times 10^{-12}$ | 1.804±0.022<br>1.742 | (9.89±0.12)×10 <sup>-12</sup><br>9.55×10 <sup>-12</sup>      | Air<br>N <sub>2</sub> |
| 2,3,4-Trimethylpentane |                        |                      |                                                              |                       |
| 273                    | $4.17 \times 10^{-12}$ | 1.522±0.023          | (6.35±0.09)×10 <sup>-12</sup>                                | Air                   |

|     |                        |                 |                                   |                |
|-----|------------------------|-----------------|-----------------------------------|----------------|
|     |                        | 1.527           | $6.37 \times 10^{-12}$            | N <sub>2</sub> |
| 283 | $4.44 \times 10^{-12}$ | 1.477±0.034     | $(6.56 \pm 0.15) \times 10^{-12}$ | Air            |
|     |                        | 1.502           | $6.67 \times 10^{-12}$            | N <sub>2</sub> |
| 293 | $4.70 \times 10^{-12}$ | 1.435±0.022     | $(6.74 \pm 0.11) \times 10^{-12}$ | Air            |
|     |                        | 1.439           | $6.76 \times 10^{-12}$            | N <sub>2</sub> |
| 303 | $4.97 \times 10^{-12}$ | 1.377±0.014     | $(6.84 \pm 0.07) \times 10^{-12}$ | Air            |
|     |                        | 1.379           | $6.85 \times 10^{-12}$            | N <sub>2</sub> |
| 313 | $5.22 \times 10^{-12}$ | 1.355±0.017     | $(7.07 \pm 0.09) \times 10^{-12}$ | Air            |
|     |                        | 1.333           | $6.96 \times 10^{-12}$            | N <sub>2</sub> |
| 323 | $5.48 \times 10^{-12}$ | 1.296±0.019     | $(7.10 \pm 0.10) \times 10^{-12}$ | Air            |
|     |                        | 1.297           | $7.11 \times 10^{-12}$            | N <sub>2</sub> |
|     |                        | 2-Methylheptane |                                   |                |
| 273 | $4.17 \times 10^{-12}$ | 1.586±0.188     | $(6.61 \pm 0.78) \times 10^{-12}$ | Air            |
|     |                        | 1.654           | $6.90 \times 10^{-12}$            | N <sub>2</sub> |
| 283 | $4.44 \times 10^{-12}$ | 1.499±0.016     | $(6.66 \pm 0.07) \times 10^{-12}$ | Air            |
|     |                        | 1.563           | $6.94 \times 10^{-12}$            | N <sub>2</sub> |
| 293 | $4.70 \times 10^{-12}$ | 1.332±0.038     | $(6.26 \pm 0.18) \times 10^{-12}$ | Air            |
|     |                        | 1.409           | $6.62 \times 10^{-12}$            | N <sub>2</sub> |
| 303 | $4.97 \times 10^{-12}$ | 1.344±0.092     | $(6.68 \pm 0.46) \times 10^{-12}$ | Air            |
|     |                        | 1.335           | $6.64 \times 10^{-12}$            | N <sub>2</sub> |
| 313 | $5.22 \times 10^{-12}$ | 1.396±0.017     | $(7.29 \pm 0.09) \times 10^{-12}$ | Air            |
|     |                        | 1.318           | $6.88 \times 10^{-12}$            | N <sub>2</sub> |
| 323 | $5.48 \times 10^{-12}$ | 1.339±0.035     | $(7.34 \pm 0.19) \times 10^{-12}$ | Air            |
|     |                        | 1.312           | $7.19 \times 10^{-12}$            | N <sub>2</sub> |
|     |                        | Nonane          |                                   |                |
| 273 | $4.17 \times 10^{-12}$ | 1.882±0.008     | $(7.85 \pm 0.04) \times 10^{-12}$ | Air            |
|     |                        | 2.009           | $8.38 \times 10^{-12}$            | N <sub>2</sub> |
| 283 | $4.44 \times 10^{-12}$ | 1.924±0.003     | $(8.54 \pm 0.02) \times 10^{-12}$ | Air            |
|     |                        | 1.982           | $8.80 \times 10^{-12}$            | N <sub>2</sub> |
| 293 | $4.70 \times 10^{-12}$ | 1.858±0.039     | $(8.73 \pm 0.18) \times 10^{-12}$ | Air            |
|     |                        | 1.888           | $8.87 \times 10^{-12}$            | N <sub>2</sub> |
| 303 | $4.97 \times 10^{-12}$ | 1.909±0.016     | $(9.49 \pm 0.08) \times 10^{-12}$ | Air            |
|     |                        | 1.917           | $9.53 \times 10^{-12}$            | N <sub>2</sub> |
| 313 | $5.22 \times 10^{-12}$ | 1.950±0.167     | $(1.02 \pm 0.09) \times 10^{-12}$ | Air            |
|     |                        | 1.858           | $9.70 \times 10^{-12}$            | N <sub>2</sub> |
| 323 | $5.48 \times 10^{-12}$ | 1.917±0.040     | $(1.05 \pm 0.02) \times 10^{-11}$ | Air            |
|     |                        | 1.842           | $1.01 \times 10^{-11}$            | N <sub>2</sub> |
|     |                        | n-Decane        |                                   |                |
| 273 | $4.17 \times 10^{-12}$ | 2.483±0.608     | $(1.04 \pm 0.25) \times 10^{-11}$ | Air            |
|     |                        | 2.391           | $9.97 \times 10^{-12}$            | N <sub>2</sub> |
| 283 | $4.44 \times 10^{-12}$ | 2.237±0.008     | $(9.93 \pm 0.04) \times 10^{-12}$ | Air            |
|     |                        | 2.309           | $1.03 \times 10^{-11}$            | N <sub>2</sub> |
| 293 | $4.70 \times 10^{-12}$ | 2.225±0.181     | $(1.05 \pm 0.08) \times 10^{-11}$ | Air            |

|     |                        |             |                                   |                |
|-----|------------------------|-------------|-----------------------------------|----------------|
|     |                        | 2.232       | $1.05 \times 10^{-11}$            | N <sub>2</sub> |
| 303 | $4.97 \times 10^{-12}$ | 2.206±0.095 | $(1.10 \pm 0.05) \times 10^{-11}$ | Air            |
|     |                        | 2.280       | $1.2132 \times 10^{-11}$          | N <sub>2</sub> |
| 313 | $5.22 \times 10^{-12}$ | 2.278±0.050 | $(1.19 \pm 0.03) \times 10^{-11}$ | Air            |
|     |                        | 2.240       | $1.17 \times 10^{-11}$            | N <sub>2</sub> |
| 323 | $5.48 \times 10^{-12}$ | 2.261±0.083 | $(1.24 \pm 0.05) \times 10^{-11}$ | Air            |
|     |                        | 2.193       | $1.20 \times 10^{-11}$            | N <sub>2</sub> |
|     |                        | n-Undecane  |                                   |                |
| 273 | $4.17 \times 10^{-12}$ | 2.426       | $1.01 \times 10^{-11}$            | Air            |
|     |                        | 2.598       | $1.08 \times 10^{-11}$            | N <sub>2</sub> |
| 283 | $4.44 \times 10^{-12}$ | 2.425±0.032 | $(1.08 \pm 0.02) \times 10^{-11}$ | Air            |
|     |                        | 2.488       | $1.10 \times 10^{-11}$            | N <sub>2</sub> |
| 293 | $4.70 \times 10^{-12}$ | 2.287±0.008 | $(1.07 \pm 0.01) \times 10^{-11}$ | Air            |
|     |                        | 2.374       | $1.12 \times 10^{-11}$            | N <sub>2</sub> |
| 303 | $4.97 \times 10^{-12}$ | 2.288±0.261 | $(1.14 \pm 0.13) \times 10^{-11}$ | Air            |
|     |                        | 2.396       | $1.19 \times 10^{-11}$            | N <sub>2</sub> |
| 313 | $5.22 \times 10^{-12}$ | 2.456±0.086 | $(1.28 \pm 0.05) \times 10^{-11}$ | Air            |
|     |                        | 2.337       | $1.22 \times 10^{-11}$            | N <sub>2</sub> |
| 323 | $5.48 \times 10^{-12}$ | 2.446±0.065 | $(1.34 \pm 0.04) \times 10^{-11}$ | Air            |
|     |                        | 2.350       | $1.29 \times 10^{-11}$            | N <sub>2</sub> |

<sup>a b</sup>The error bar was taken as  $2\sigma$ .

**Table S4.** Lifetime of OH + Alkanes.

| Alkanes                | Lifetime (day) |
|------------------------|----------------|
| Propane                | 11.46          |
| Isobutane              | 5.29           |
| n-Butane               | 4.40           |
| Isopentane             | 3.32           |
| n-pentane              | 3.22           |
| Cyclopentane           | 2.40           |
| 2,2-Dimethylbutane     | 5.65           |
| 2,3-Dimethylbutane     | 2.06           |
| 2-Methylpentane        | 2.38           |
| 3-Methylpentane        | 2.28           |
| Methylcyclopentane     | 1.58           |
| 2,4-Dimethylpentane    | 2.41           |
| Cyclohexane            | 1.61           |
| 2-Methylhexane         | 1.70           |
| 3-Methylhexane         | 1.84           |
| 2,2,4-Trimethylpentane | 3.23           |
| n-Heptane              | 1.71           |
| Methylcyclohexane      | 1.25           |

|                        |      |
|------------------------|------|
| 2,3,4-Trimethylpentane | 1.68 |
| 2-Methylheptane        | 1.55 |
| 3-Methylheptane        | 1.50 |
| n-Octane               | 1.44 |
| Nonane                 | 1.10 |
| n-Decane               | 0.98 |
| n-Undecane             | 0.87 |

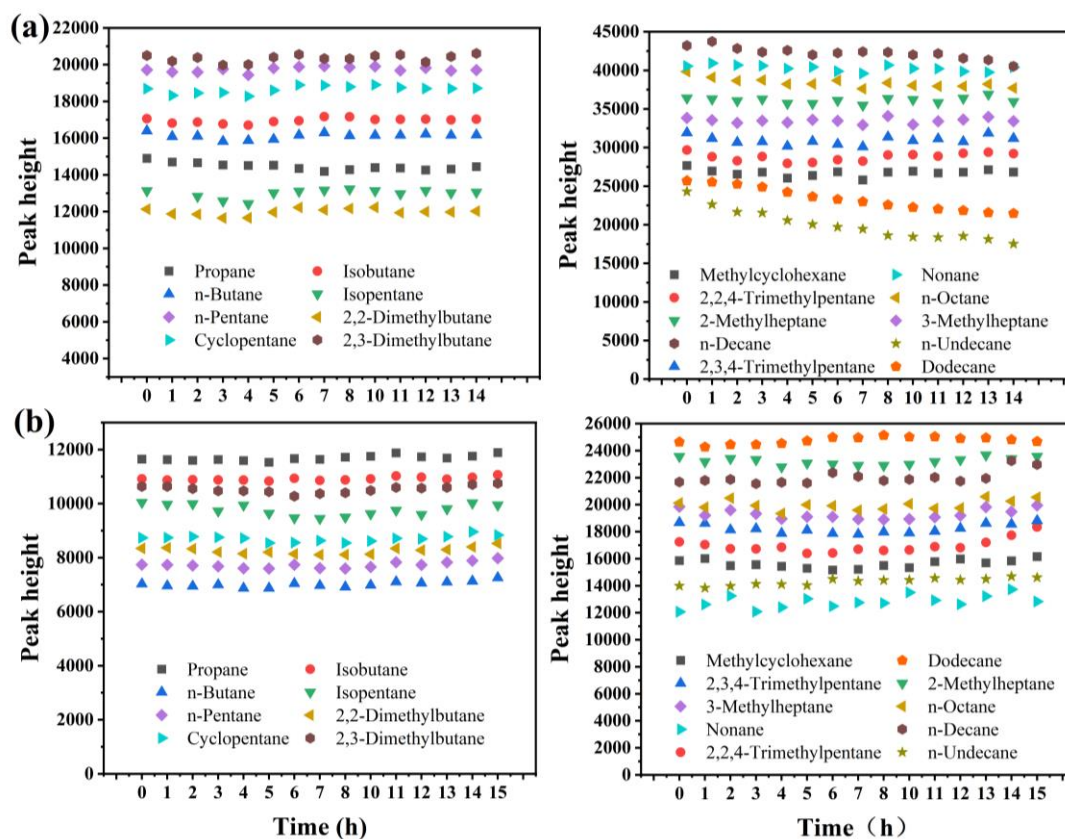

**Figure S1.** (a) Peak height of C3-C11 alkanes in Alkanes+N<sub>2</sub>+dark at 0-14 h. (b) Peak height of C3-C11 alkanes in Alkanes+N<sub>2</sub>+H<sub>2</sub>O<sub>2</sub>+dark at 0-15h. The following data have been displaced for reasons of clarity: a) Propane, Isobutane, n-Butane, Isopentane, 2,2-Dimethylbutane, Methylcyclohexane, 2,2,4-Trimethylpentane, 2,3,4-Trimethylpentane, 2-Methylheptane, 3-Methylheptane, n-Undecane, Ducedane vertically displaced by 8000, 2000, -3000, -6000, -8000, -4000, -4000, -2500, -1000, -4000, -12000, 8000 units, respectively; b) Propane, Isobutane, n-Butane, n-pentane, Cyclopentane, 2,2-Dimethylbutane, 2,3,4-Trimethylpentane, 2-Methylheptane, Nonane, n-Decane, n-Undecane, Ducedane vertically displaced by 8000, 3000, -3000, -2000, -2500, -1000, 1000, 4000, -8000,1000,-1500,17000 units, respectively.

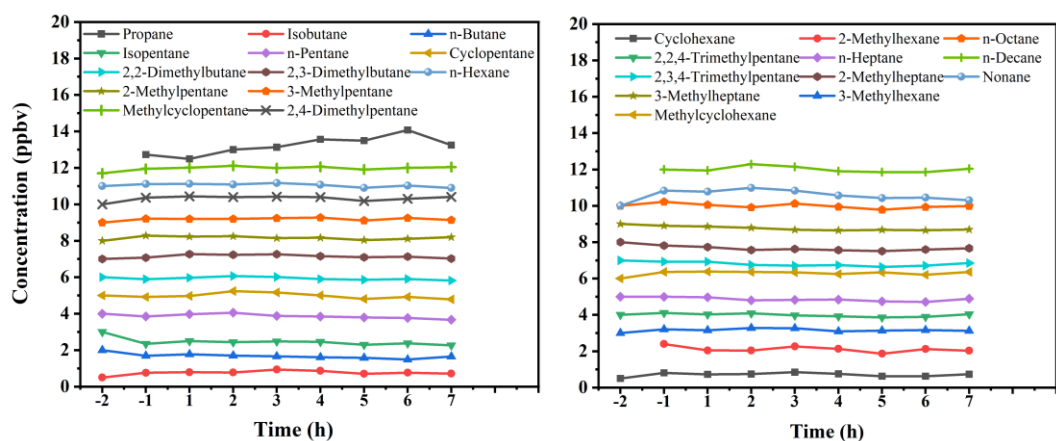

**Figure S2.** Concentration of C3-C11 alkanes in Alkanes+N<sub>2</sub>+UV light at different time. The following data have been displaced for reasons of clarity: Propane, Isobutane, n-Butane, Isopentane, n-pentane, Cyclopentane, 2,2-Dimethylbutane, 2,3-Dimethylbutane, 2-Methylpentane, 3-Methylpentane, n-Hexane, Methylcyclopentane, Cyclohexane, 2-Methylhexane, 3-Methylhexane, 2,2,4-Trimethylpentane, n-Heptane, Methylcyclohexane, 2,3,4-Trimethylpentane, 2-Methylheptane, 3-Methylheptane, n-Decane, vertically displaced by -3, -9.5, -8, -7, -6, -5, -4, -3, -2, -1, 1, 1.7, 9.5, -19, -7, -6, -5, -4, -3, -2, -1, 2 units, respectively. The -2 and -1 of abscissa refer to 2 and 1 hours before turning on the light respectively. 1-7 refers to 1-7 hours after turning on the light respectively.

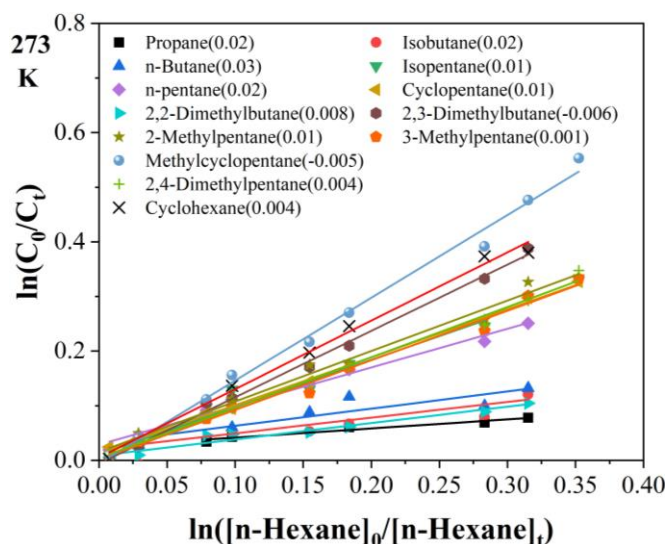

**Figure S3.** Typical kinetic data as acquired with the multivariate relative rate technique at 273 K for the reaction of the alkanes with the OH radical using n-hexane as reference compound. Numbers in parentheses are intercepts.



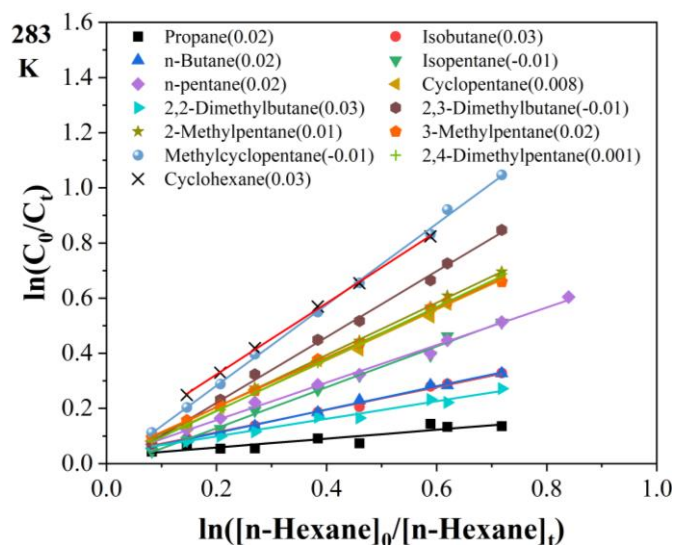

**Figure S4.** Typical kinetic data as acquired with the multivariate relative rate technique at 283 K for the reaction of the alkanes with the OH radical using n-hexane as reference compound. Numbers in parentheses are intercepts.

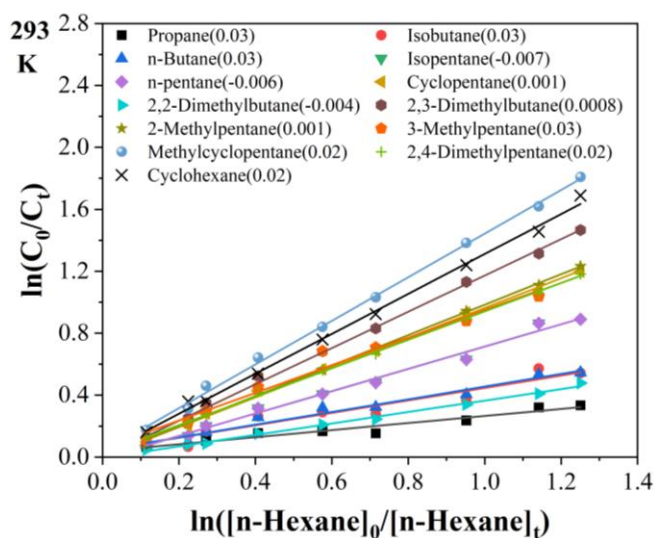

**Figure S5.** Typical kinetic data as acquired with the multivariate relative rate technique at 293 K for the reaction of the alkanes with the OH radical using n-hexane as reference compound. Numbers in parentheses are intercepts.

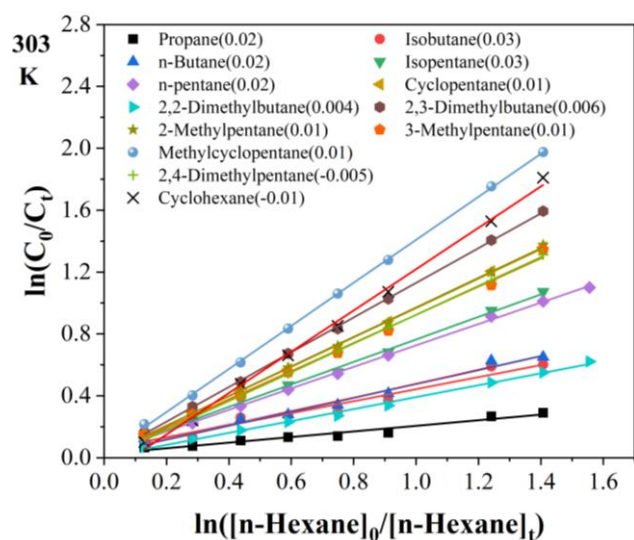

**Figure S6.** Typical kinetic data as acquired with the multivariate relative rate technique at 303 K for the reaction of the alkanes with the OH radical using n-hexane as reference compound. Numbers in parentheses are intercepts.

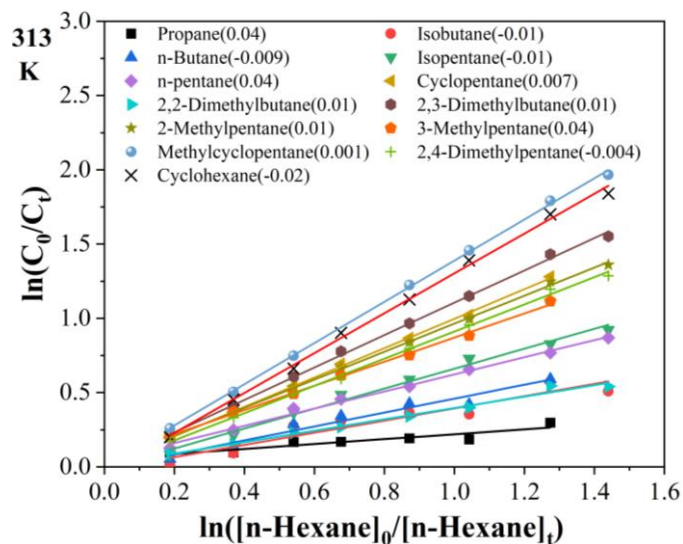

**Figure S7.** Typical kinetic data as acquired with the multivariate relative rate technique at 313 K for the reaction of the alkanes with the OH radical using n-hexane as reference compound. Numbers in parentheses are intercepts.

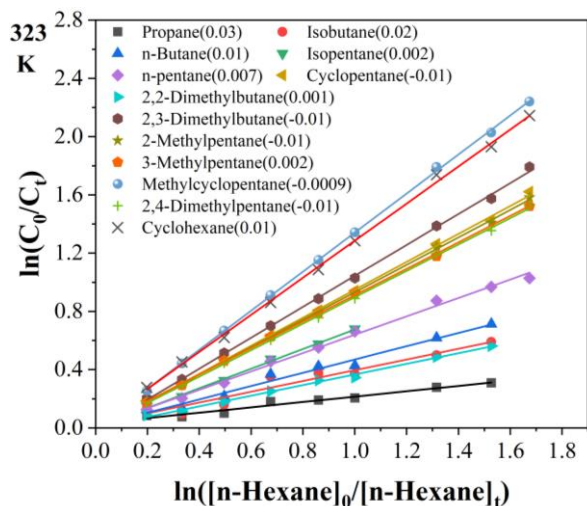

**Figure S8.** Typical kinetic data as acquired with the multivariate relative rate technique at 323 K for the reaction of the alkanes with the OH radical using n-hexane as reference compound. Numbers in parentheses are intercepts.

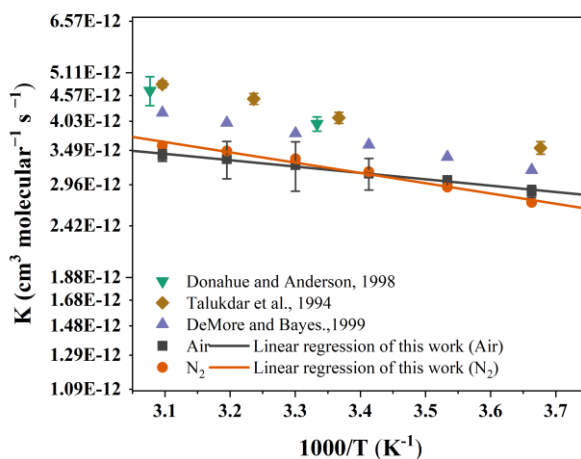

**Figure S9.** Arrhenius plot for the reaction of n-pentane with OH at 273-323 K along with available literature data. The error bar was taken as  $2\sigma$ .

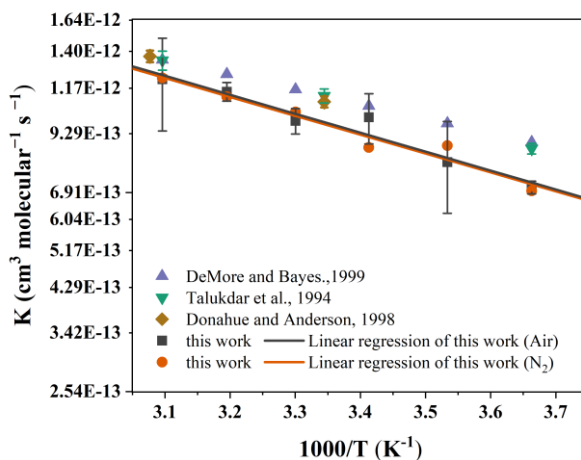

**Figure S10.** Arrhenius plot for the reaction of propane with OH at 273-323 K along with available literature data. The error bar was taken as  $2\sigma$ .

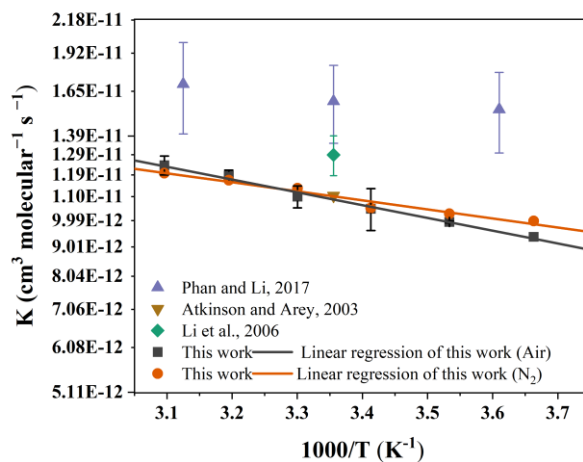

**Figure S11.** Arrhenius plot for the reaction of methylcyclopentane with OH at 273-323 K along with available literature data. The error bar was taken as  $2\sigma$ .

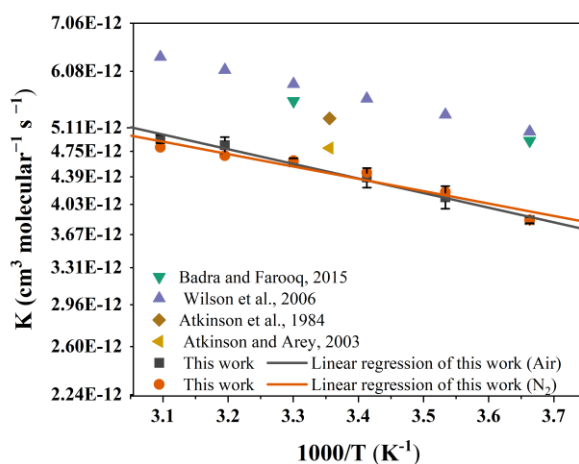

**Figure S12.** Arrhenius plot for the reaction of 2,4-Dimethylpentane with OH at 273-323 K along with available literature data. The error bar was taken as  $2\sigma$ .

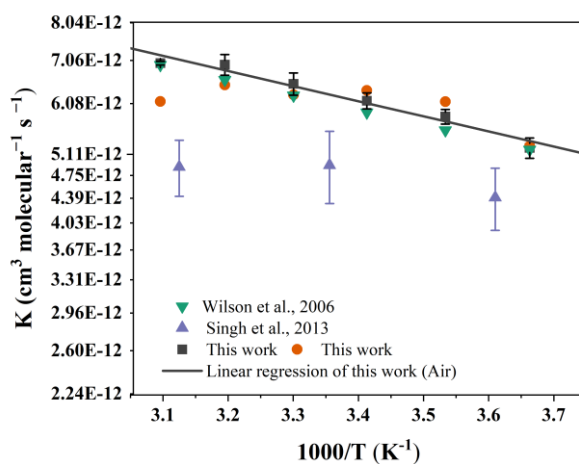

**Figure S13.** Arrhenius plot for the reaction of cyclohexane with OH at 273-323 K along with available literature data. The error bar was taken as  $2\sigma$ .

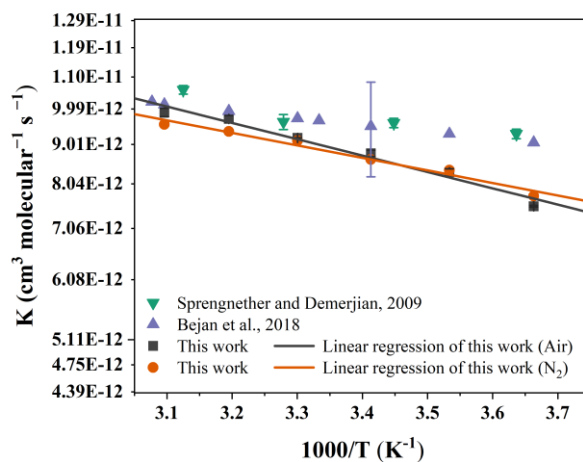

**Figure S14.** Arrhenius plot for the reaction of methylcyclohexane with OH at 273-323 K along with available literature data. The error bar was taken as  $2\sigma$ .

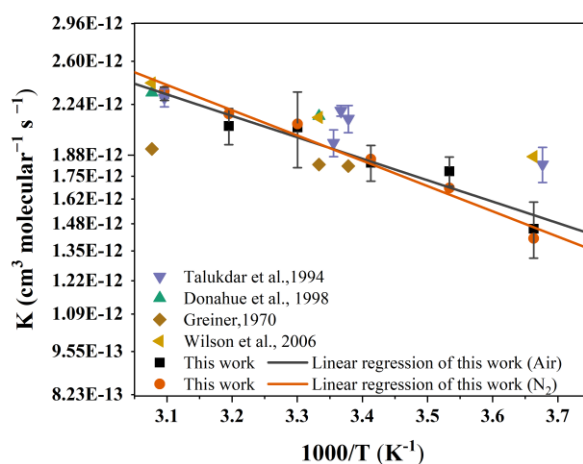

**Figure S15.** Arrhenius plot for the reaction of Isobutane with OH at 273-323 K along with available literature data. The error bar was taken as  $2\sigma$ .

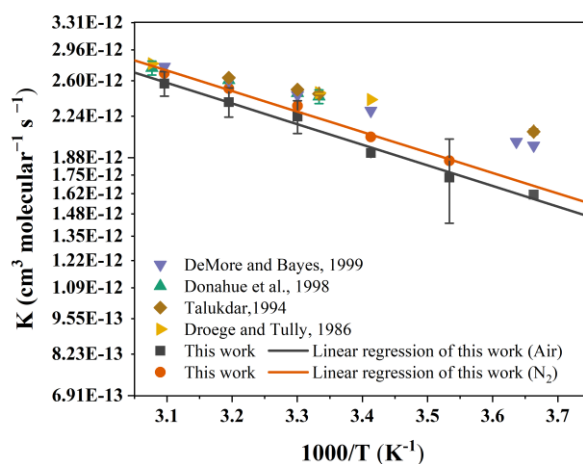

**Figure S16.** Arrhenius plot for the reaction of n-butane with OH at 273-323 K along with available literature data. The error bar was taken as  $2\sigma$ .

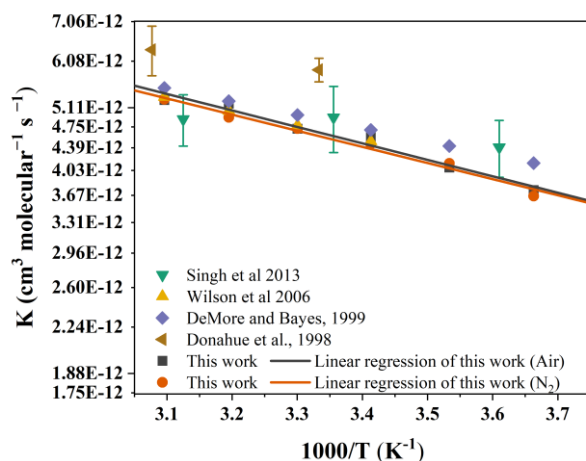

**Figure S17.** Arrhenius plot for the reaction of Cyclopentane with OH at 273-323 K along with available literature data. The error bar was taken as  $2\sigma$ .

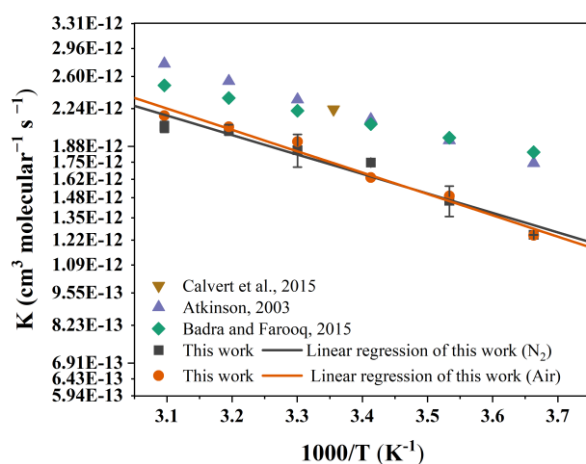

**Figure S18.** Arrhenius plot for the reaction of 2,2-Dimethylbutane with OH at 273-323 K along with available literature data. The error bar was taken as  $2\sigma$ .

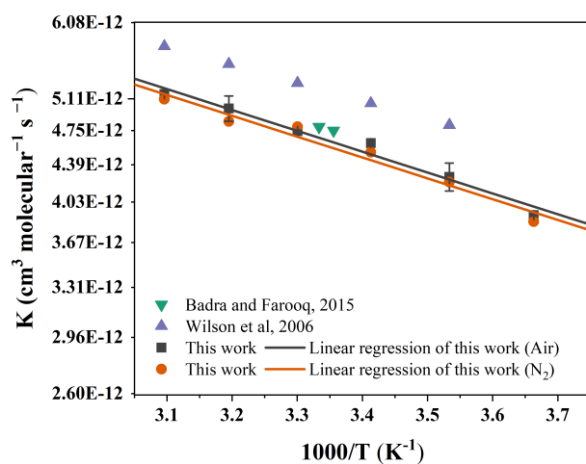

**Figure S19.** Arrhenius plot for the reaction of 2-Methylpentane with OH at 273-323 K along with available literature data. The error bar was taken as  $2\sigma$ .

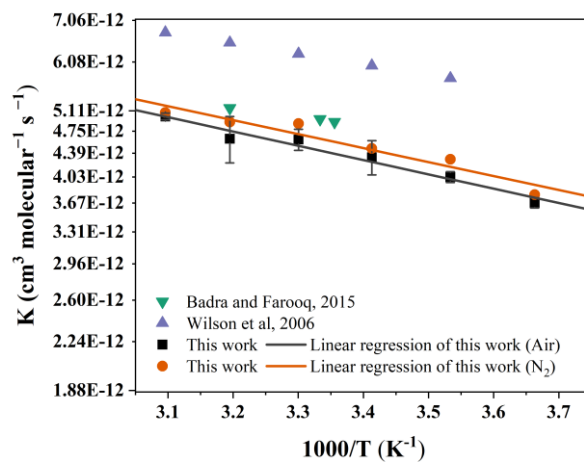

**Figure S20.** Arrhenius plot for the reaction of 3-Methylpentane with OH at 273-323 K along with available literature data. The error bar was taken as  $2\sigma$ .

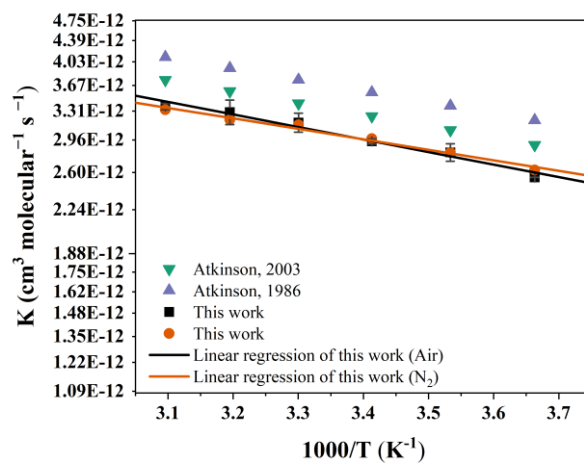

**Figure S21.** Arrhenius plot for the reaction of 2,2,4-Trimethylpentane with OH at 273-323 K along with available literature data. The error bar was taken as  $2\sigma$ .
